# Supplementary material for: Genetic substructure of Guizhou Tai-Kadai-speaking people inferred from genome-wide single nucleotide polymorphisms data
Source: Frontiers journal article supplement (doi:10.3389/fevo.2022.995783), 2022-09-13
Supplement: Table_7.XLSX [file Table_7.XLSX]

## Sheet: Supplementary Table S7A
Spplementary Table S7A. Y-chromosome Haplogroup distribution in Guizhou Tai-Kadai-speaking population.
Haplogroup	Bouyei_Guanling		Zhuang_Congjiang		Gelao_Wuchuan		Mulao_Majiang		Dong_Liping		Dong_Wanshn
	N	Frequency	N	Frequency	N	Frequency	N	Frequency	N	Frequency	N	Frequency
C1b1a2-AMM008	0	0	0	0	0	0	0	0	0	0	1	0.1
C2c1b-CTS12931	0	0	0	0	0	0	0	0	2	0.0769231	1	0.1
D1a1a-F3306	0	0	1	0.0344828	1	0.030303	0	0	1	0.0384615	2	0.2
N1b1a-Z8029	0	0	0	0	0	0	0	0	1	0.0384615	1	0.1
N1b1b-Y23802	0	0	0	0	19	0.575758	0	0	0	0	0	0
N1b2a-M1903	0	0	0	0	0	0	0	0	3	0.115385	0	0
O1a1a-P203.2	16	0.941176	0	0	2	0.0606061	34	0.971429	4	0.153846	0	0
O1a2-M103	0	0	0	0	0	0	0	0	4	0.153846	0	0
O1b1a-M1470	0	0	1	0.0344828	2	0.0606061	0	0	2	0.0769231	2	0.2
O2a1a-F3143	0	0	0	0	0	0	0	0	4	0.153846	0	0
O2a1c- F562	0	0	0	0	4	0.121212	1	0.0285714	3	0.115385	1	0.1
O2a2a-M188	1	0.0588235	21	0.724138	1	0.030303	0	0	1	0.0384615	2	0.2
O2a2b-CTS11109	0	0	6	0.206897	4	0.121212	0	0	1	0.0384615	0	0
Total	17	1	29	1	33	1	35	1	26	1	10	1

## Sheet: Supplementary Table S7B
Supplementary Table S7B. Mitochondrial DNA Haplogroup distribution in Guizhou Tai-Kadai-speaking population.
Haplogroup	Bouyei_Guanling		Zhuang_Congjiang		Gelao_Wuchuan		Mulao_Majiang		Dong_Liping		Dong_Wanshn
	N	Frequency	N	Frequency	N	Frequency	N	Frequency	N	Frequency	N	Frequency
A	1	0.0222222	0	0	0	0	0	0	4	0.0888889	0	0
A5	0	0	0	0	0	0	1	0.025641	0	0	1	0.05
A15	0	0	0	0	1	0.0204082	0	0	0	0	0	0
B4	8	0.177778	8	0.156863	3	0.0612245	8	0.205128	7	0.155556	1	0.05
B5	2	0.0444444	4	0.0784314	1	0.0204082	8	0.205128	7	0.155556	4	0.2
B6	1	0.0222222	0	0	2	0.0408163	0	0	0	0	1	0.05
C4	0	0	0	0	2	0.0408163	0	0	0	0	1	0.05
C7	3	0.0666667	0	0	6	0.122449	1	0.025641	1	0.0222222	0	0
D4	1	0.0222222	11	0.215686	4	0.0816327	1	0.025641	3	0.0666667	2	0.1
D5	1	0.0222222	1	0.0196078	1	0.0204082	2	0.0512821	1	0.0222222	1	0.05
D6	0	0	1	0.0196078	0	0	0	0	0	0	0	0
F1	5	0.111111	11	0.215686	5	0.102041	2	0.0512821	5	0.111111	0	0
F2	3	0.0666667	0	0	3	0.0612245	1	0.025641	3	0.0666667	0	0
F3	0	0	0	0	0	0	1	0.025641	2	0.0444444	1	0.05
F4	0	0	0	0	0	0	0	0	0	0	1	0.05
G1	0	0	5	0.0980392	0	0	0	0	1	0.0222222	1	0.05
G2	0	0	0	0	5	0.102041	0	0	1	0.0222222	0	0
G3	0	0	0	0	1	0.0204082	0	0	1	0.0222222	0	0
M7	12	0.266667	8	0.156863	6	0.122449	10	0.25641	5	0.111111	1	0.05
M8	0	0	1	0.0196078	1	0.0204082	1	0.025641	0	0	0	0
M9	2	0.0444444	0	0	0	0	0	0	0	0	0	0
M10	3	0.0666667	0	0	1	0.0204082	0	0	0	0	0	0
M11	0	0	0	0	2	0.0408163	0	0	0	0	0	0
M12	0	0	0	0	0	0	0	0	1	0.0222222	0	0
M33	0	0	0	0	0	0	0	0	0	0	0	0
M74	0	0	0	0	0	0	0	0	0	0	2	0.1
M75	0	0	0	0	0	0	1	0.025641	0	0	0	0
M76	0	0	0	0	0	0	1	0.025641	0	0	0	0
N9	0	0	0	0	1	0.0204082	0	0	1	0.0222222	0	0
R9	3	0.0666667	1	0.0196078	1	0.0204082	1	0.025641	2	0.0444444	2	0.1
R11	0	0	0	0	1	0.0204082	0	0	0	0	0	0
Y1	0	0	0	0	1	0.0204082	0	0	0	0	1	0.05
Y2	0	0	0	0	1	0.0204082	0	0	0	0	0	0
Total	45	1	51	1	49	1	39	1	45	1	20	1
